# Supplementary material for: Comparative proteomic and transcriptomic analyses provide new insight into the formation of seed size in castor bean
Source: BMC Plant Biol. 2020 Jan 30;20:48. doi: 10.1186/s12870-020-2249-1 (PMC6993385; doi:10.1186/s12870-020-2249-1)
Supplement: Supplementary file 4 — Additional file 4: Table S3. Eight protein species involved in cell cycle control, cell division, chromosome partitioning [file 12870_2020_2249_MOESM4_ESM.xls]

## Sheet: Sheet1
Table S3 Eight protein species involved in cell cycle control, cell division, chromosome partitioning
GroupID	Gene model	Accession	Desription	Score	Mass	Cov	Seq	SameSets	Spectrum	Unique Spectrum	Peptide	Unique Peptide	107_117-VS-306_121
95	29828.m000387	29828.t000012	calmodulin, putative	664	20240	54.4	MADQLTDDQISEFKEAFSLFDKDGDGCITTKELGTVMRSLGQNPTEAELQDMINEVDADGNGTIDFPEFLNLMARKMKDTDSEEELKEAFRVFDKDQNGFISAAELRHVMTNLGEKLTDEEVDEMIREADVDGDGQINYEEFVKVMMAK	1	31	31	8	8	3.799
177	30190.m011017	30190.t000253	calmodulin, putative	358	19907	53.7	MGKDLSEEQVSSMKEAFTLFDTDGDGKIAPSELGILMRSLGGNPTQAQLKTIIAEENLTAAFDFPRFLDLMAKHMKPEPFDRQLRDAFKVLDKDNTGYVSVADLRHILTSIGEKLEPAEFDEWIREVDVGSDGRIRYEDFIARMVAK	0	18	18	7	7	0.876
853	30115.m001194	30115.t000020	Caltractin, putative	55	24084	17.6	MASLYRGASRKDIKPRGRHHGLSQQKKQEIKEAFELFDTDGSGTIDAKELNVAMRALGFEMTEEQITQMIADVDKDGSGAIDFDEFVHMMTAKIGERDTKEELMKAFRIIDQDNNGKISVDDIKRIVKDLGENFTDREIREMVEEADRDHDGEVGVEEFMRMMKRTTYGY	0	2	2	2	2	1.239
934	29908.m006207	29908.t000258	calmodulin, putative	47	19573	7.1	MQRQVLILFLSISMALTASLSAEIETLNQVLCLVEAFRAFDSDNDGSITTAELGGILGSLGYNASKQDVRAMMQQGDTNKDGLLSMDEFLEMNTKDIELGVLGNILKTASEALDADEAVTPGELCEVIQNGGTDISLETCQHIVASMDGDGDGAITFEDLQLIVNSLI	0	1	1	1	1	---
963	29841.m002907	29841.t000171	calcineurin B subunit, putative	45	23418	6.3	MGNASSMLTQYDIEEVQRHCHNLFSQQEIVSLYQRFCQLDRNAKGFISADEFLSVPEFAMNPLCQRLLKMVDGLNFKDFVAFLSAFSAKASVEQKIGLIFKVYDSDGNGKVSFKDILEVLQDLSGSFMSDEQREQVLCQVLKEAGYTRESYLMLDDFIKVFGNSGLTMEVEVPVD	0	1	1	1	1	---
1027	29983.m003286	29983.t000185	calcium-dependent protein kinase, putative	40	25113	12.3	MNKLKKMALRVIAERLSEEEIGGLKELFKMIDTDSSGTITFDELKEGLKRVGSELMESEIKDLMDAADIDNSGTIDYGEFLAATVHLNKLEREENLVSAFSFFDKDGSGYITIDELQQACKEFGLSELHLDEMIREIDQDNDGQIDYGEFAAMMRKGNGGIGRRTMRSTFNLADALGVTANGSKVFD	0	2	2	2	2	1.538
1280	29742.m001399	29742.t000035	importin-alpha re-exporter, putative	25	124030	1.2	MDLNPEFLSQCFLHTLSPAPEPRRAAEAQLTKAADLPNYALAVLRLVAEPSVDEQIRHAAAVNFKNHLRSRWAPSQDSSLTPLQDSEKDQIKTLIVTLMLSSAPRIQSQLSESLSLIGKHDFPKSWLTLLPELVSNLEAASRNNDYNSINGILGTANSIFKKFRYQYKTNDLLLDLKYCLDNFTVPLLNIFLRTAALIESAMSSGGGSPVTLRPLFESQRLCCRIFYSLNFQELPEFFEDNMEKWMNEFKKYLTTSYPALESNADGQSVVDDLRAAVCENISLYMEKNEEEFKGYVEGFALAIWTLLGNVSQSSGRDRLAVTAIKFLTTVSTSVQHTLFATDGIIPQICQGIVIPNVRLRDEDEELFEMNYIEFIRRDMEGSDLDTRRRIACELLKGIA…	0	1	1	1	1	---
1297	30193.m000720	30193.t000021	uvb-resistance protein uvr8, putative	19	52468	3.2	MAEEGASEVTAPVRRVLLISAGASHSVALLSGNVVCTWGRGEDGQLGHGDAQDRLSPTILSTLEGLEIISVICGADHTIAYSESHTDVYSWGWGDFGRLGHGNSSDLFTPQPIRQLHGLKIKQIACGDSHCLAVTMEGQVQSWGRNQNGQLGLGTTEDSLVPQKIQAFQGVPIKMVAAGAEHTAAVTEDGELYGWGWGRYGNLGLGDRKDRLVPEKVSLPHGEKMVMVACGWRHTISVSSSGGLYTYGWSKYGQLGHGDYADHLIPHQLEALQGSFISQISGGWRHTMAVTSDGKLYGWGWNKFGQVGVGDNVDRSSPVQVKLPLEQKVILISCGWRHTLAVTERQNVFSWGRGTNGQLGNGECTDRNVPVIIKALSVDGSCGQHIESSMVDSSSGKTW…	0	1	1	1	1	---
